# Supplementary material for: Crowding in the emergency department in the absence of boarding – a transition regression model to predict departures and waiting time
Source: Springer Nature journal article supplement (doi:10.1186/s12874-019-0710-3), 2019-03-29
Supplement: MOESM3 [file 16585170]

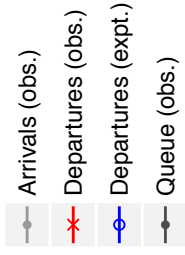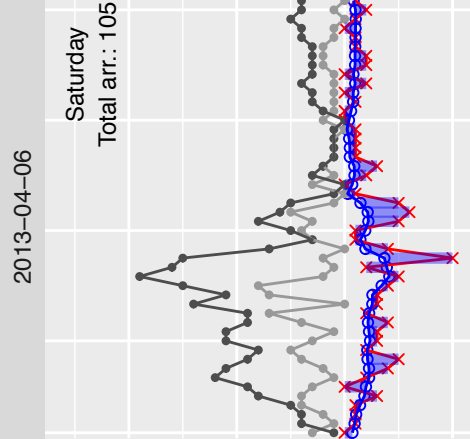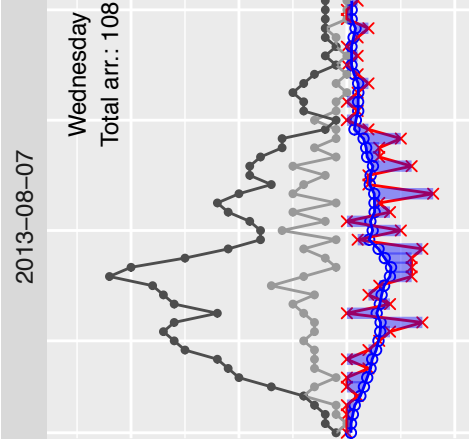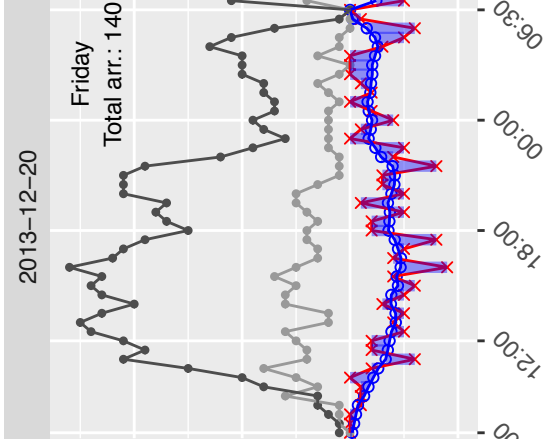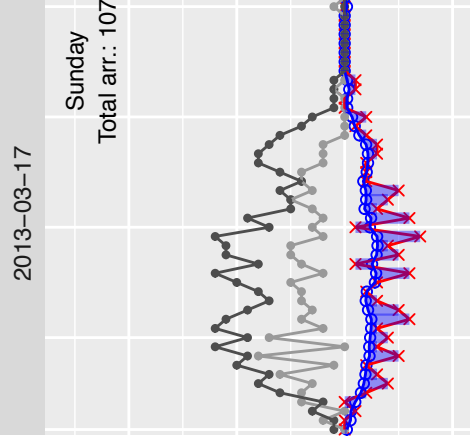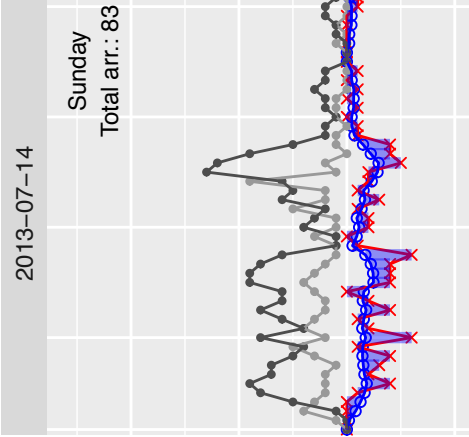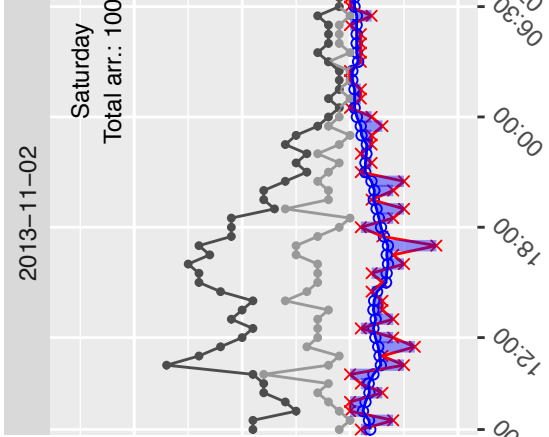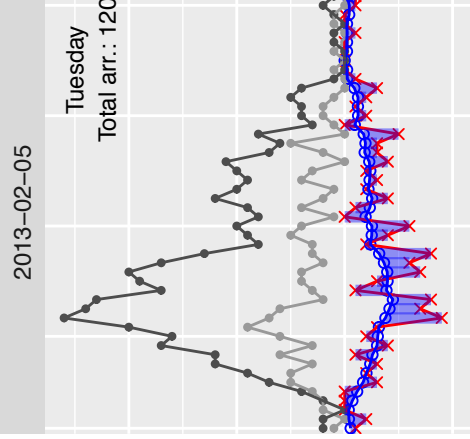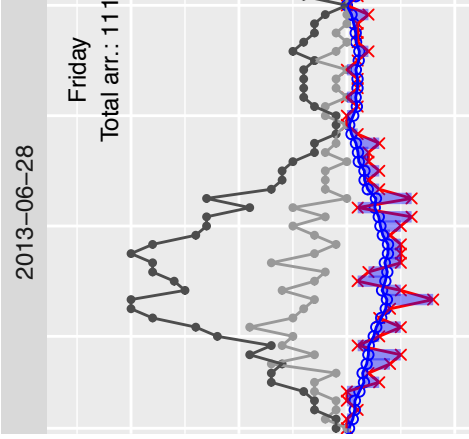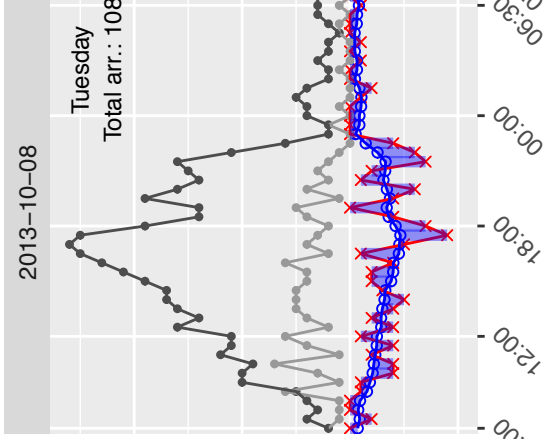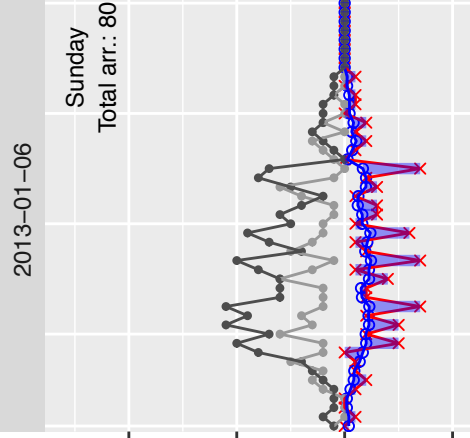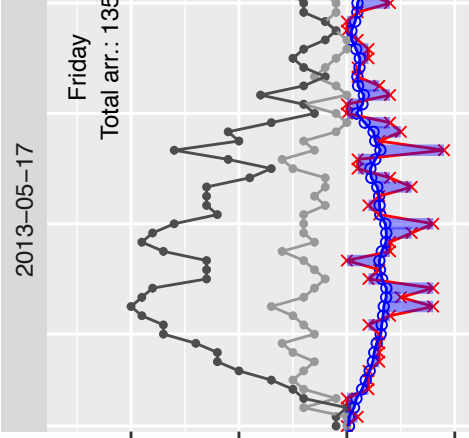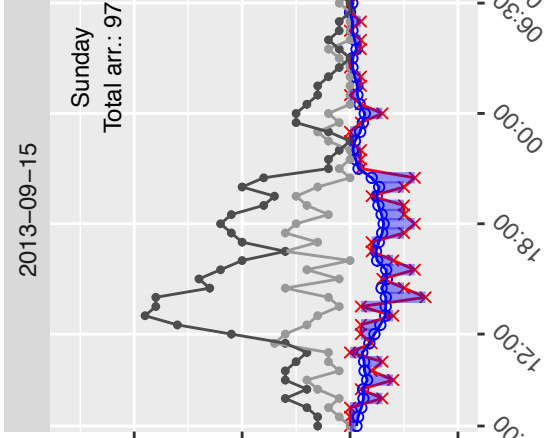

Arrivals & departures

Time of day

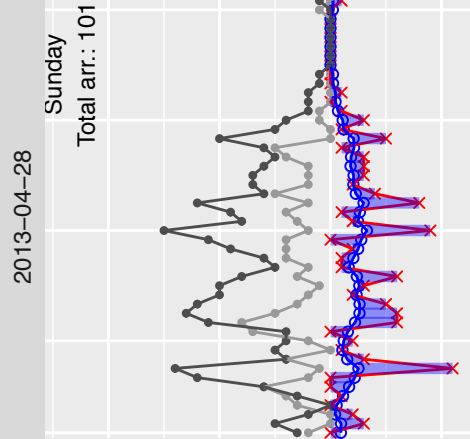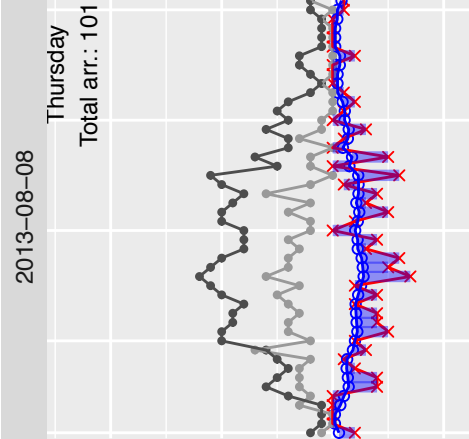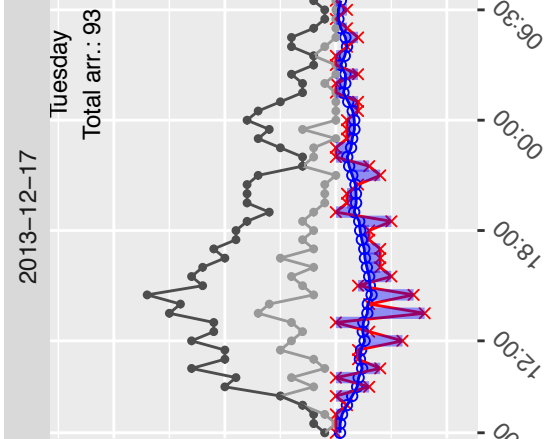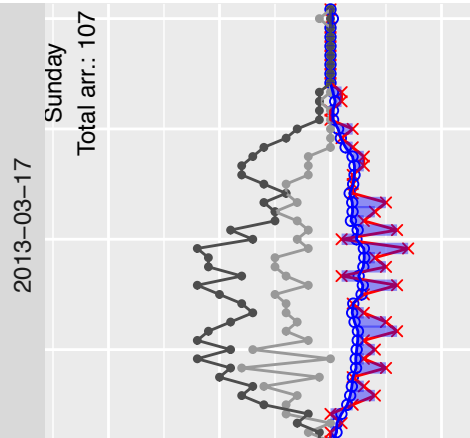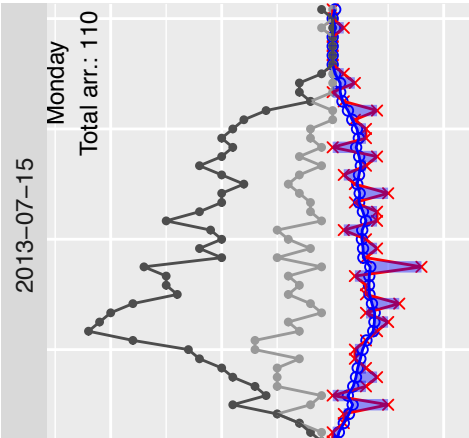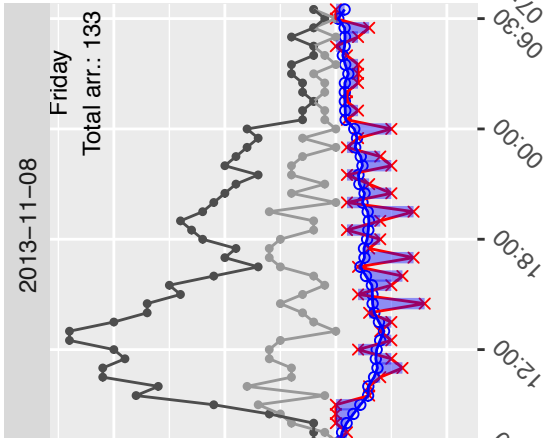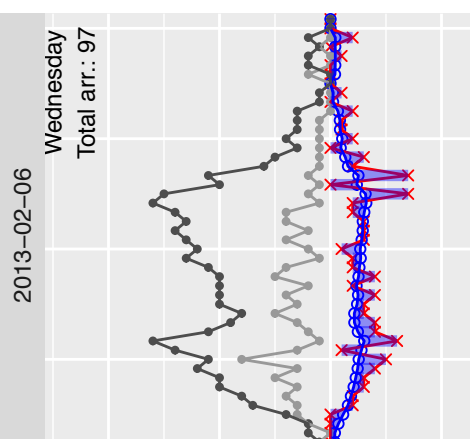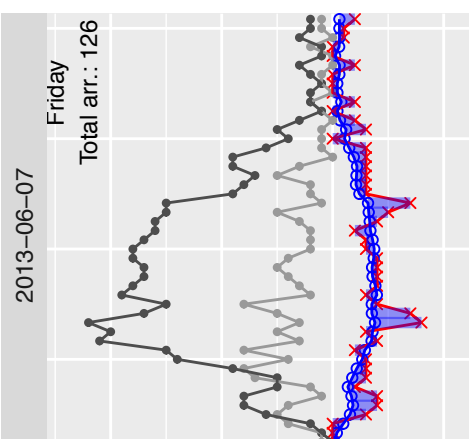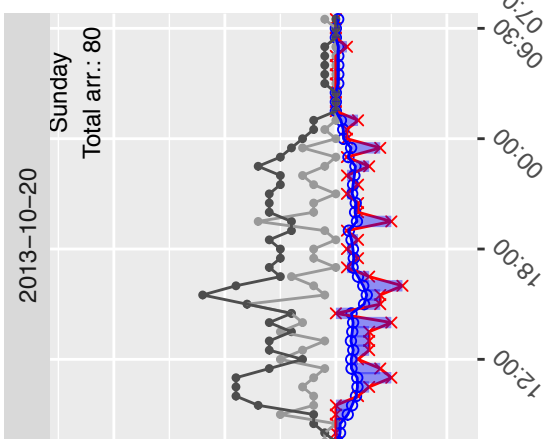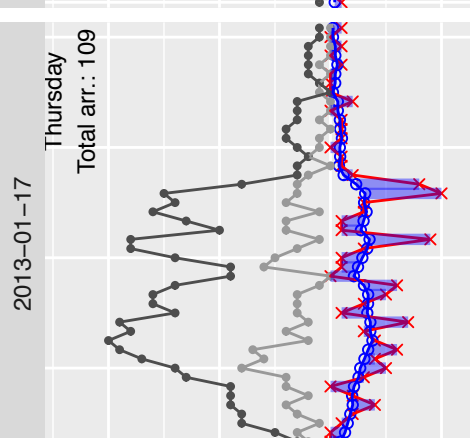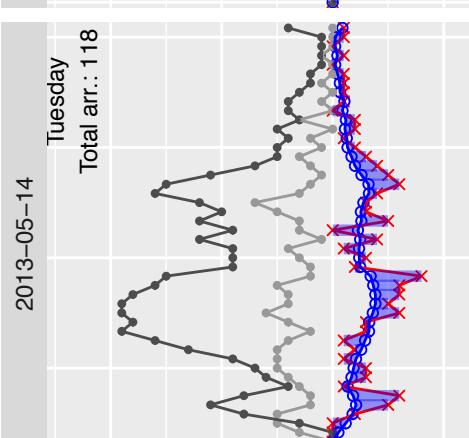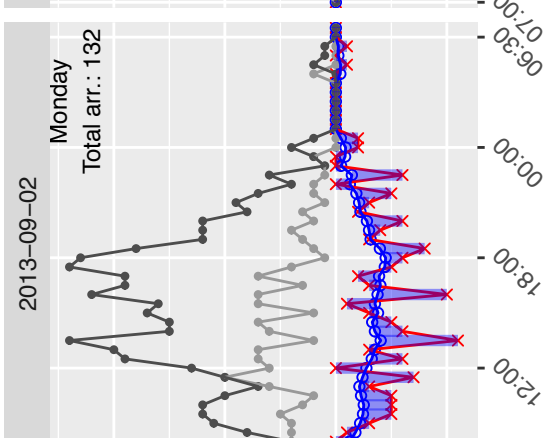

Arrivals & departures

Time of day

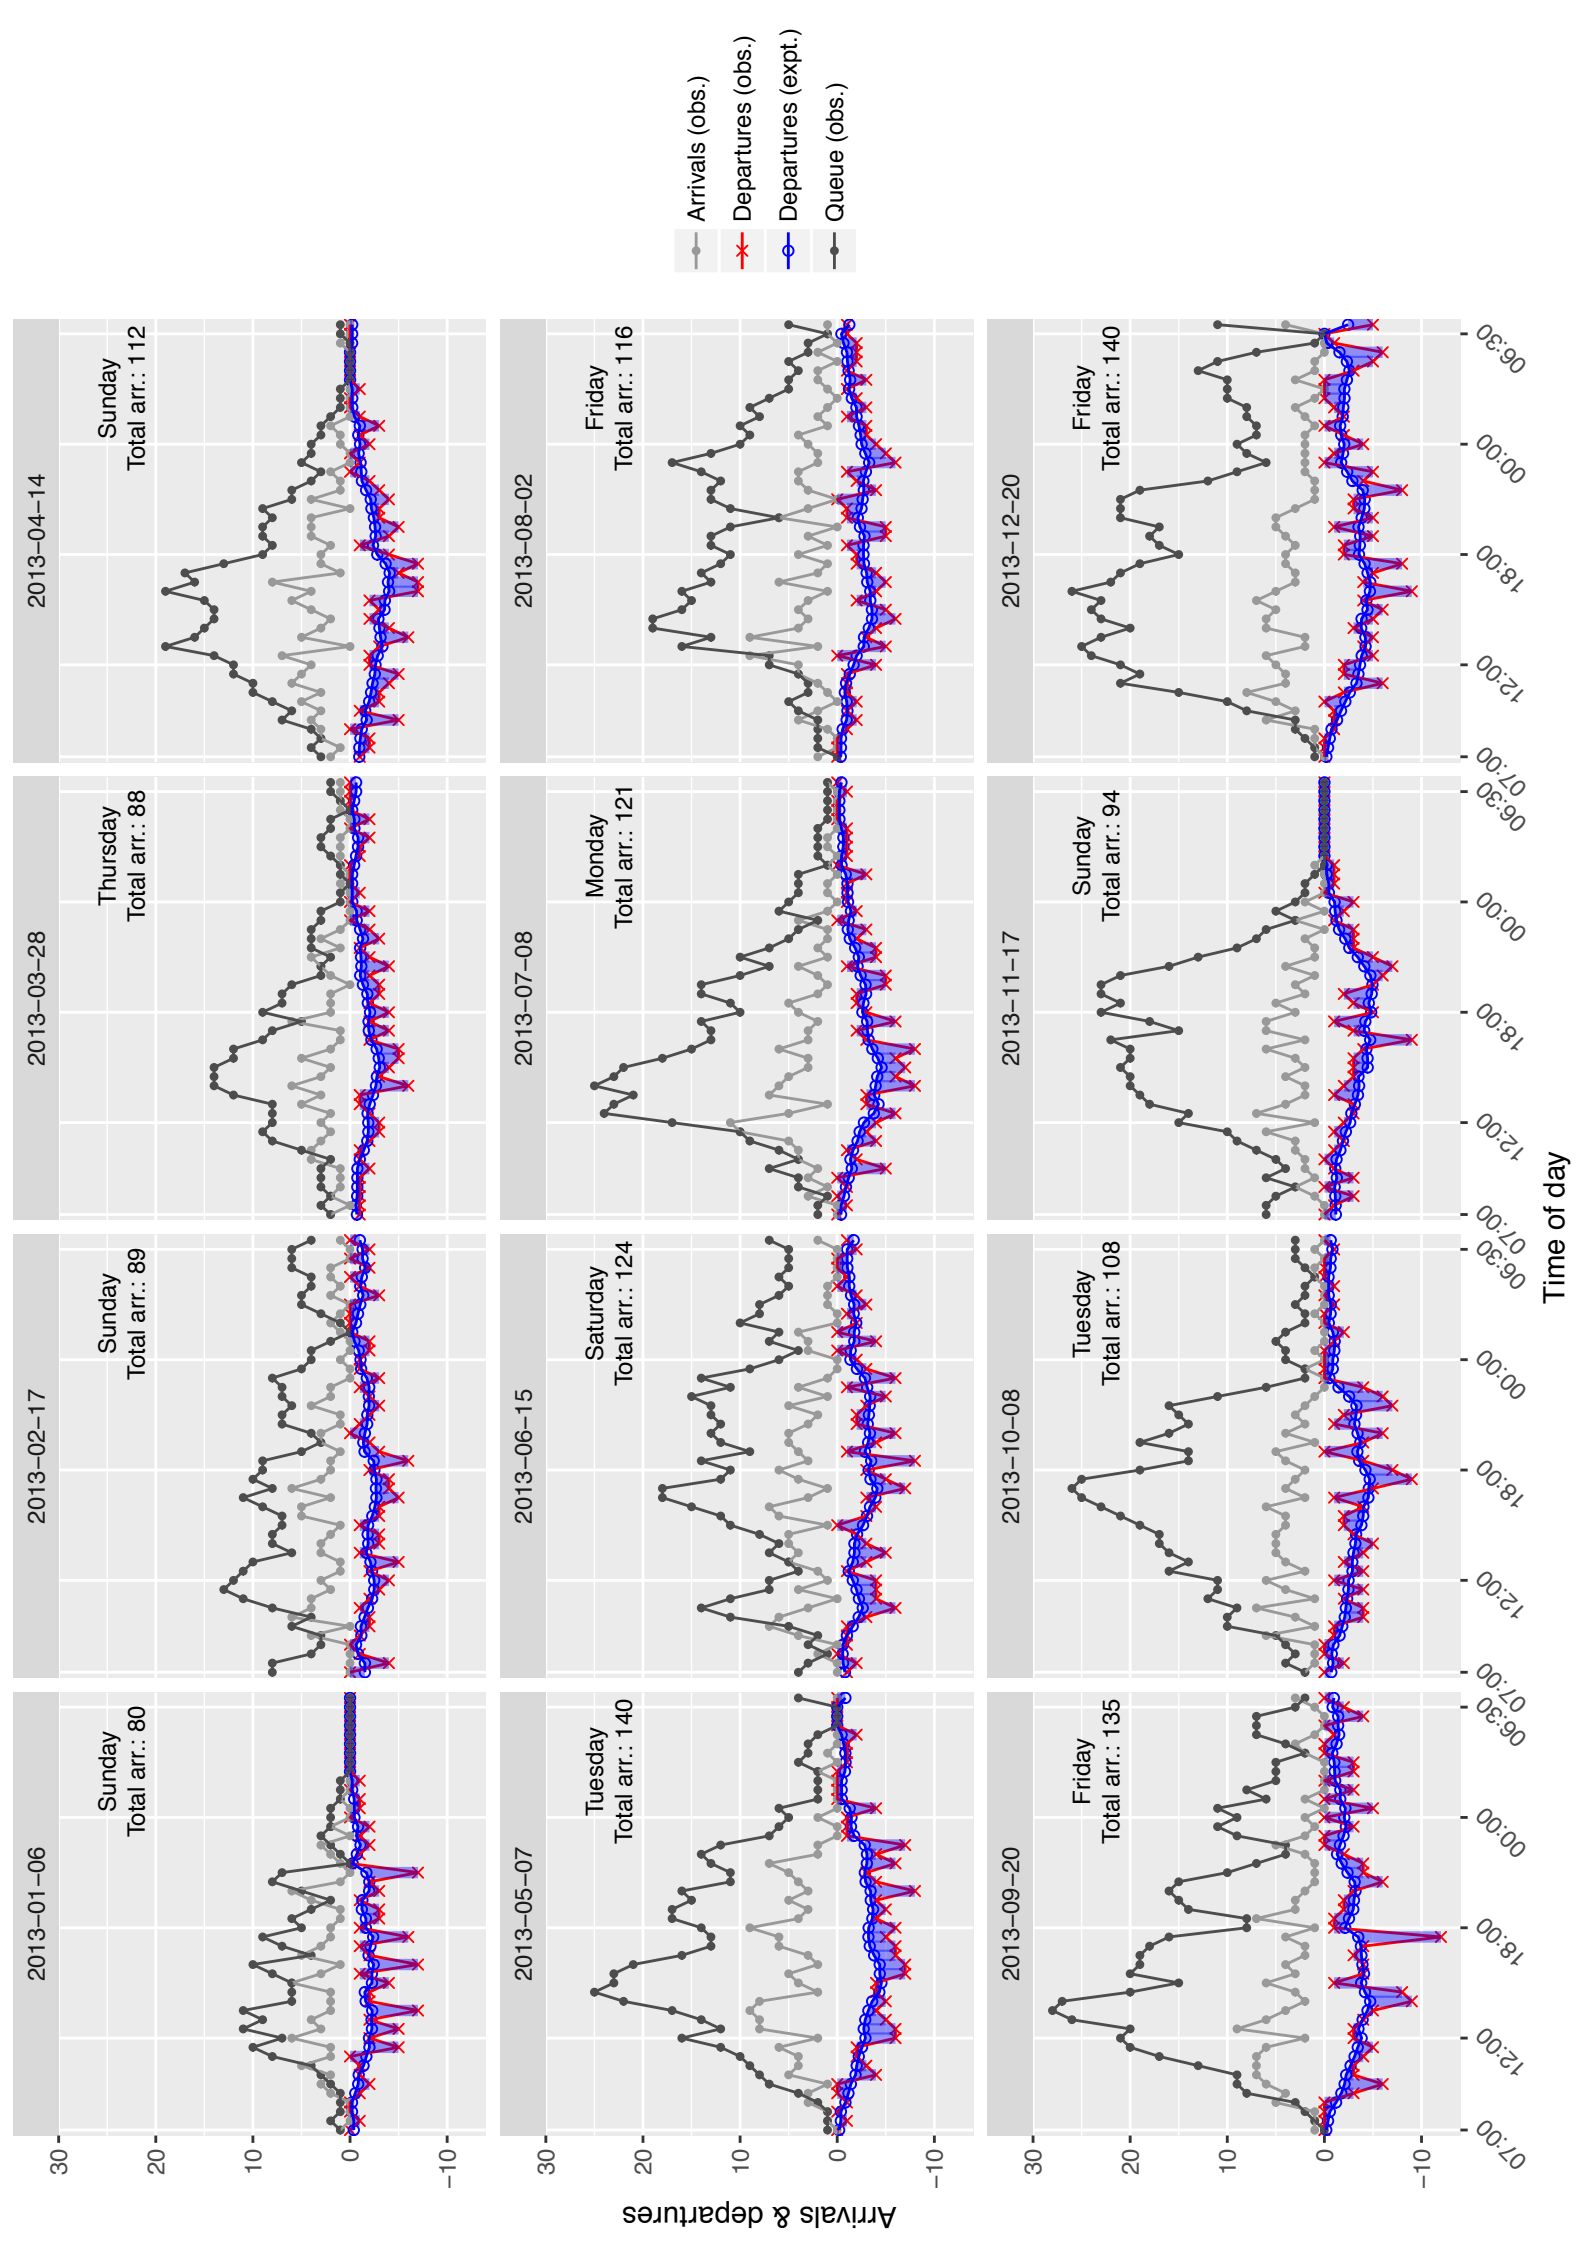

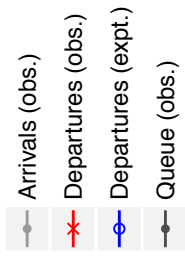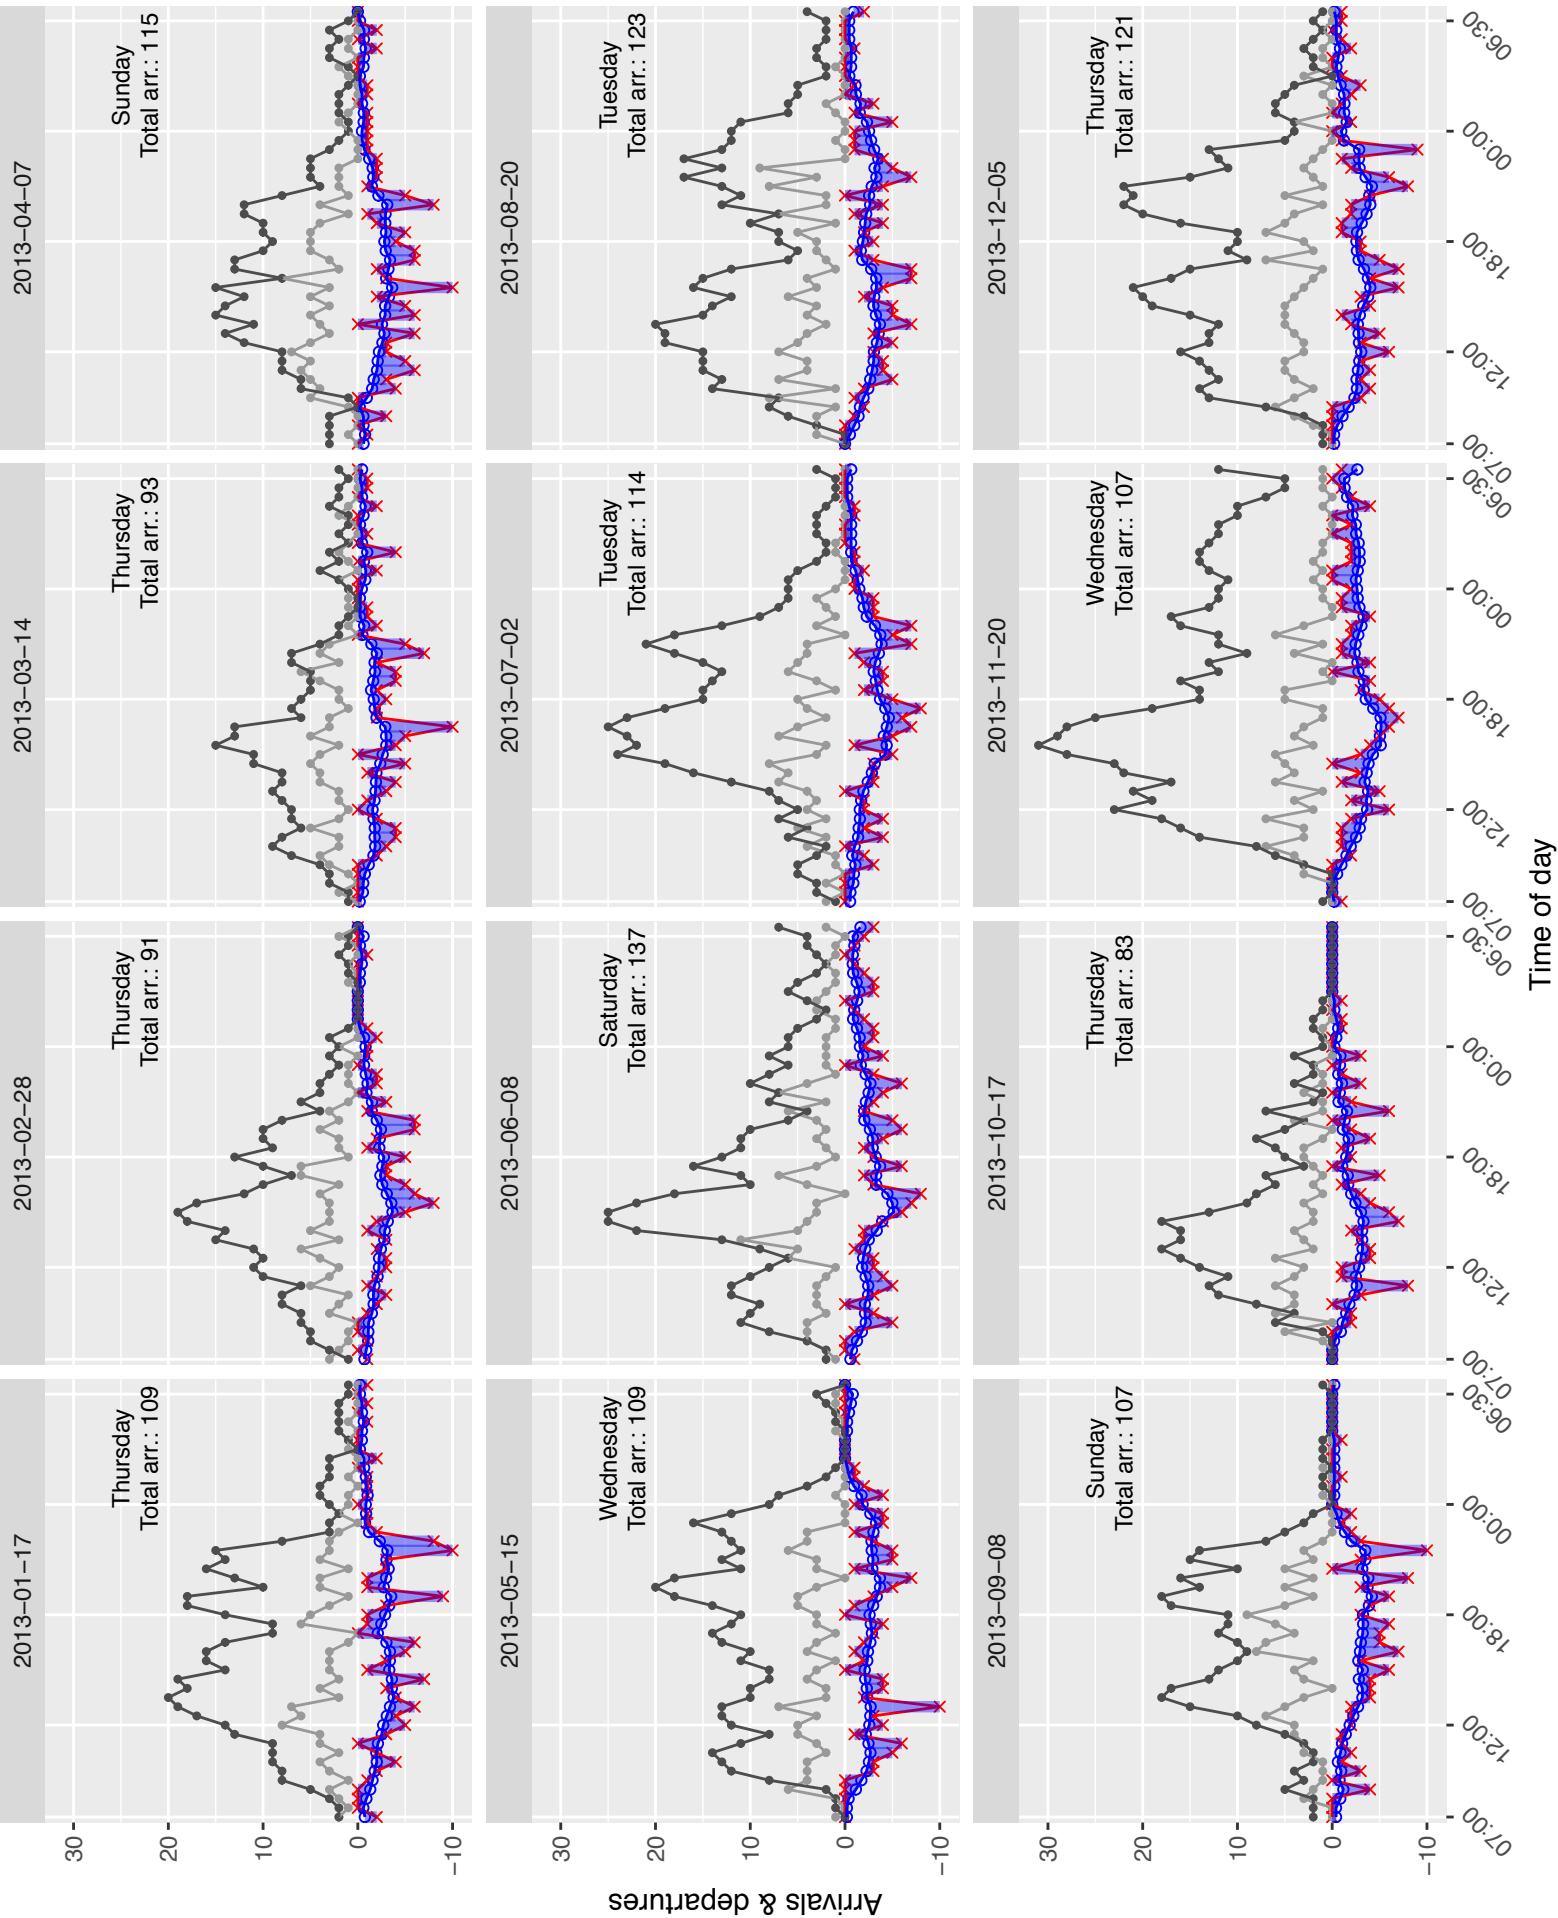



2013-04-15

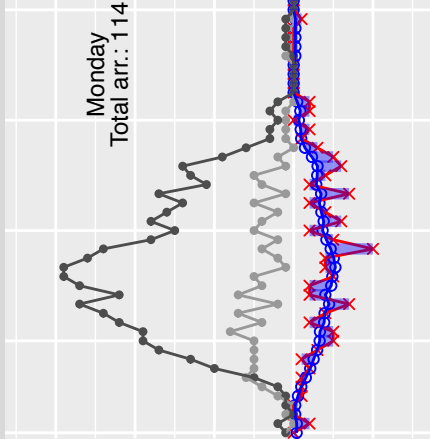

2013-08-08

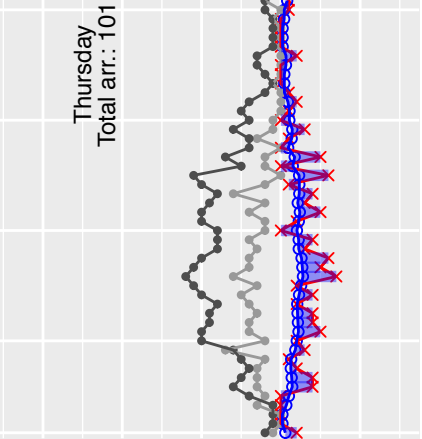

2013-12-24

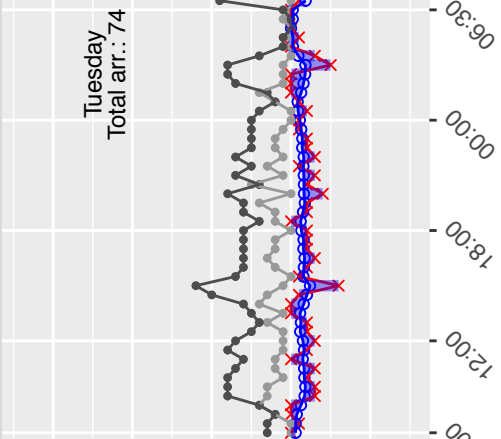

2013-03-07

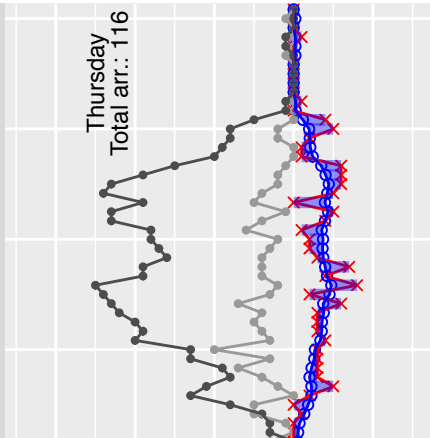

2013-07-20

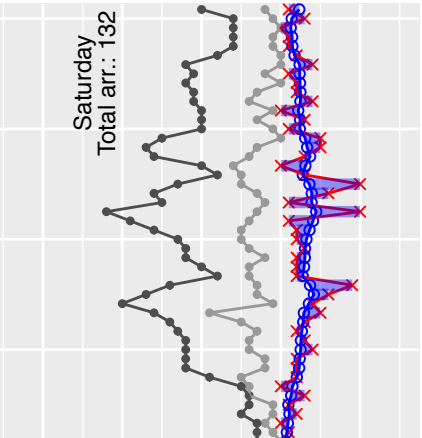

2013-11-05

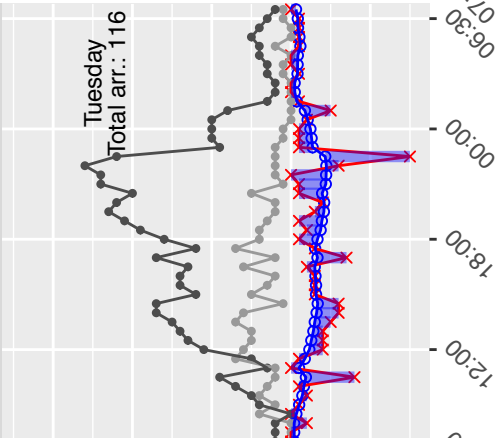

2013-02-14

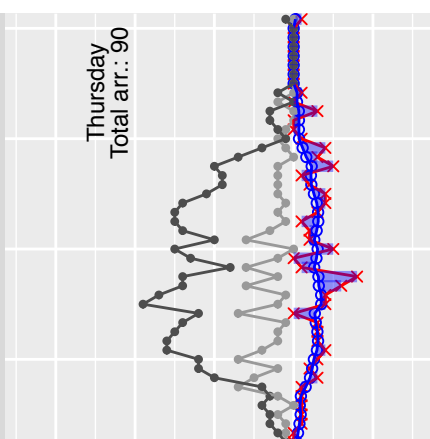

2013-06-02

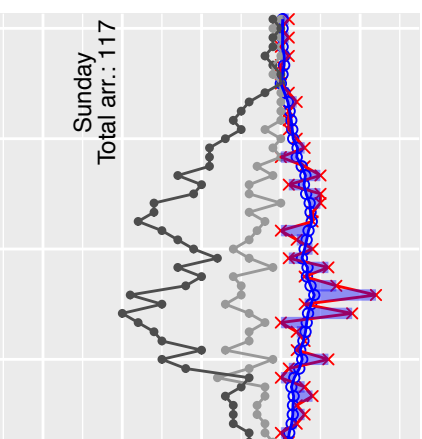

2013-10-20

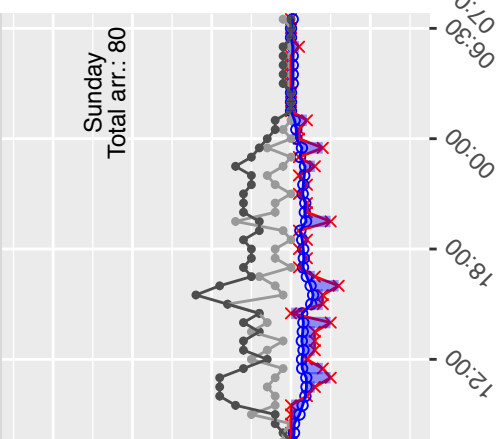

2013-01-28

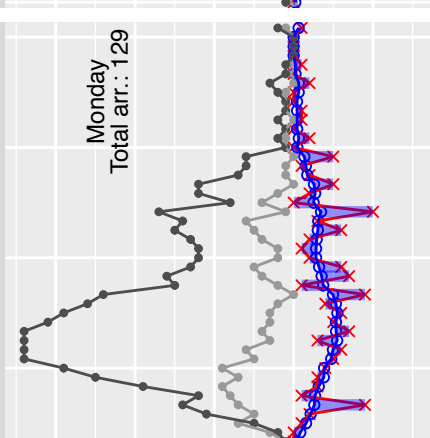

2013-05-08

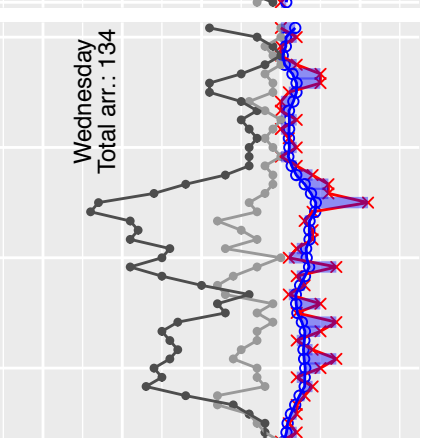

2013-09-17

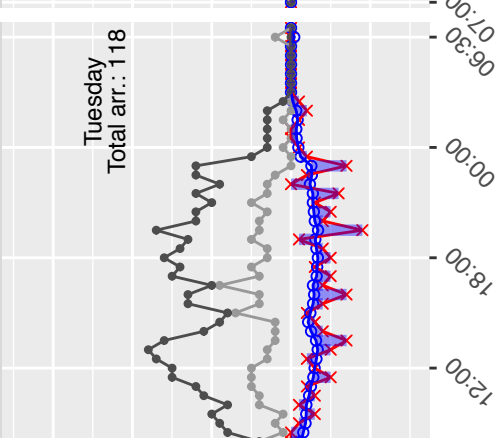

Arrivals & departures

Time of day

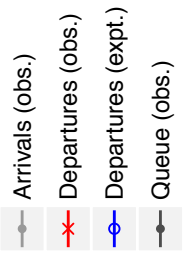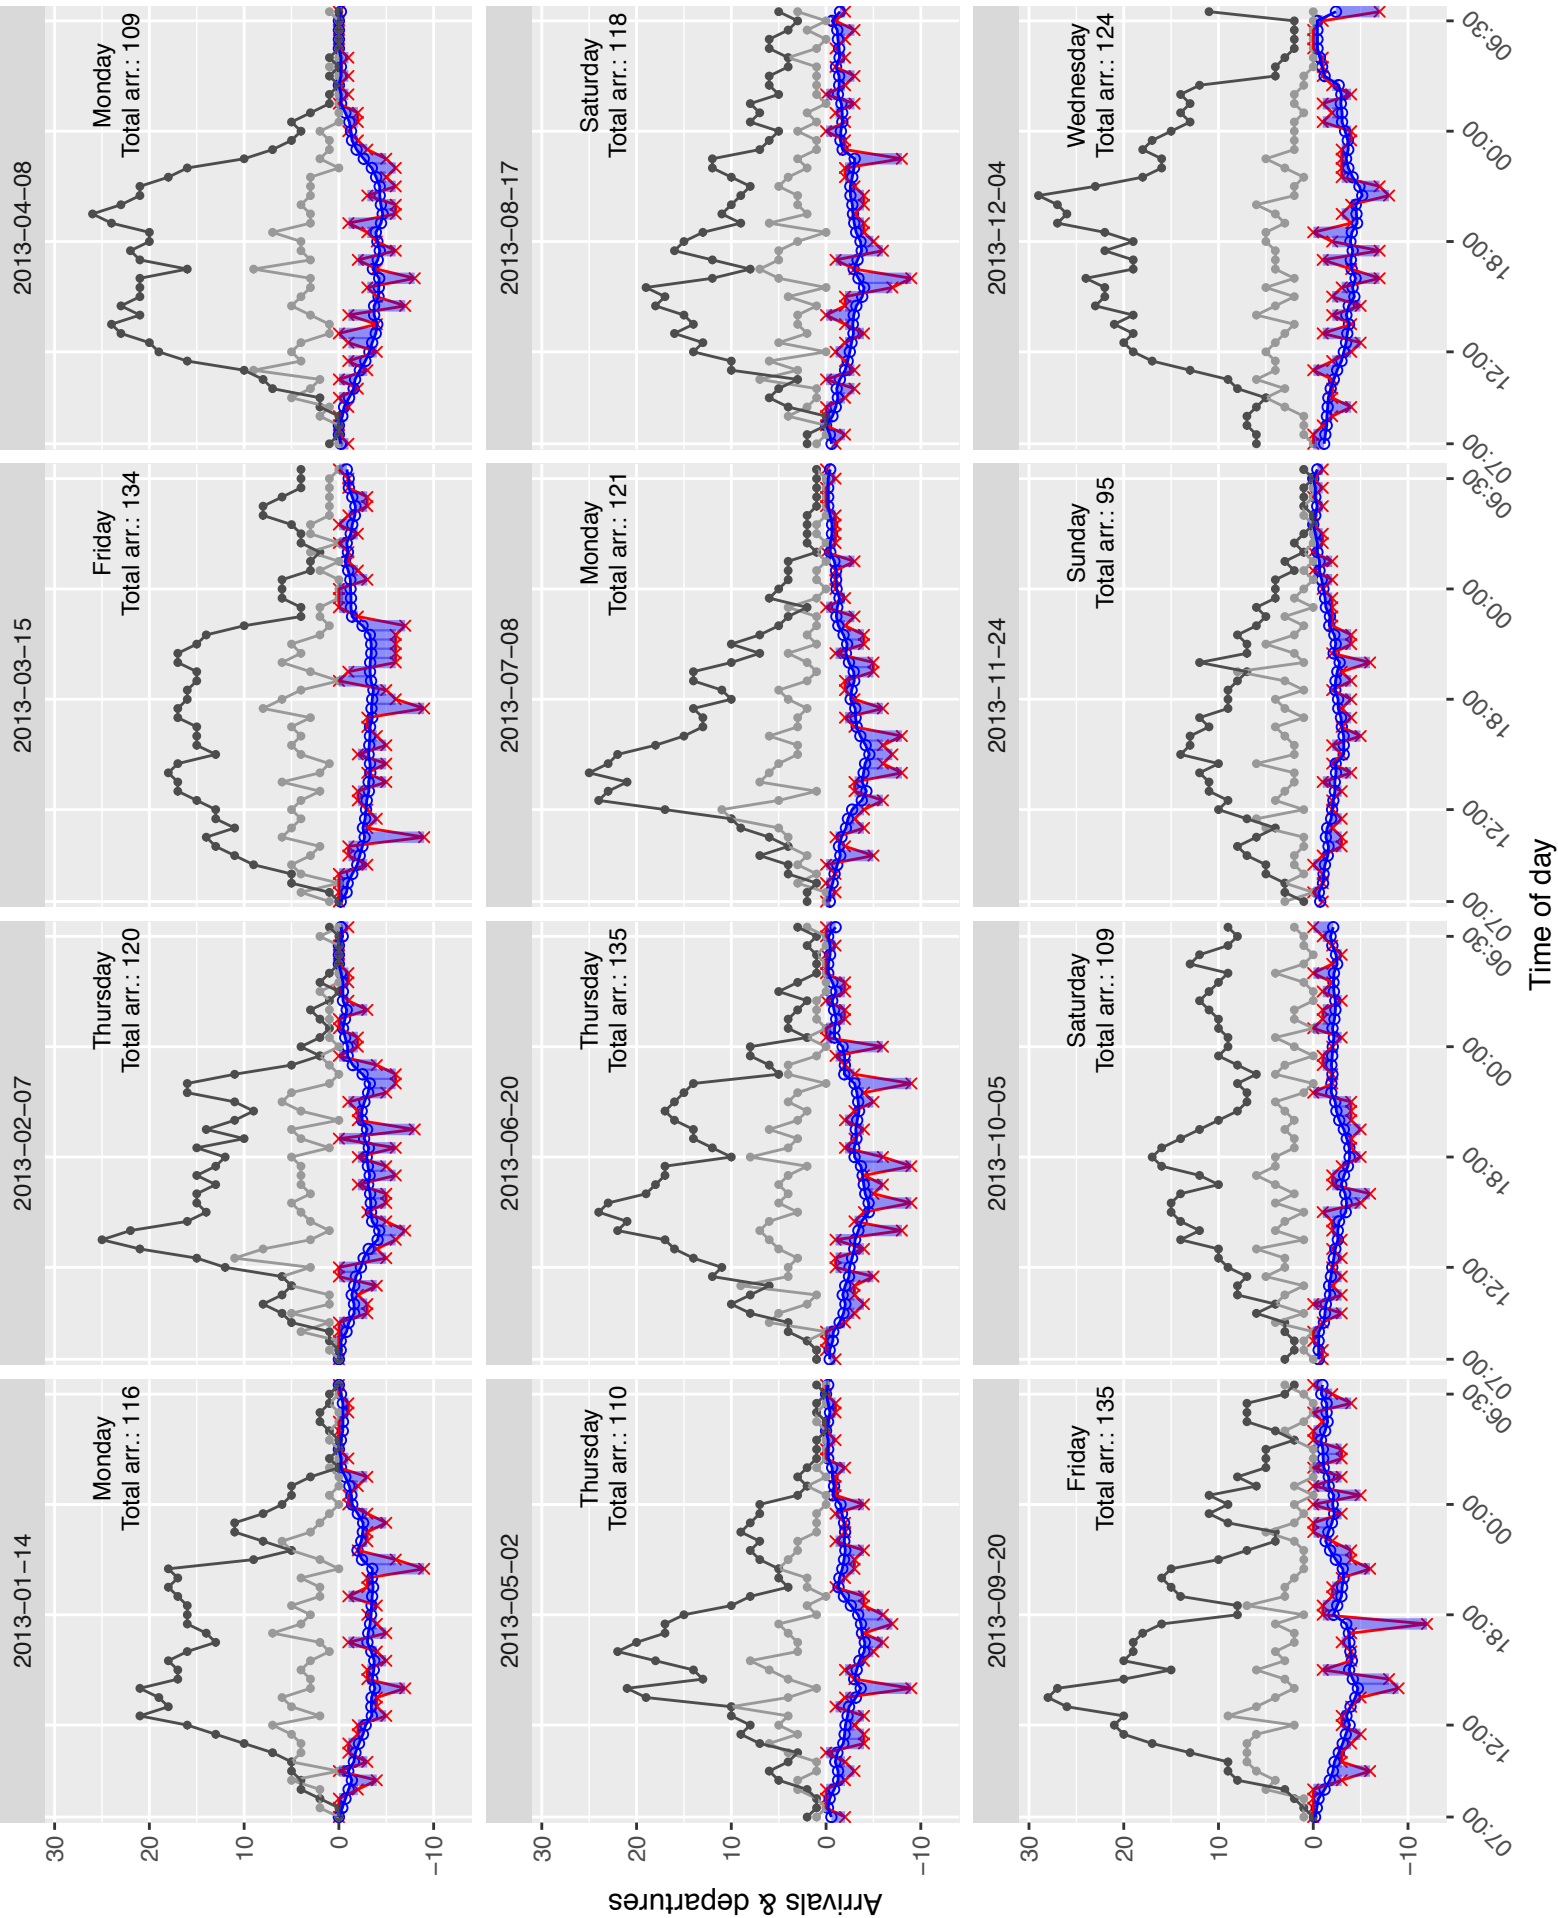

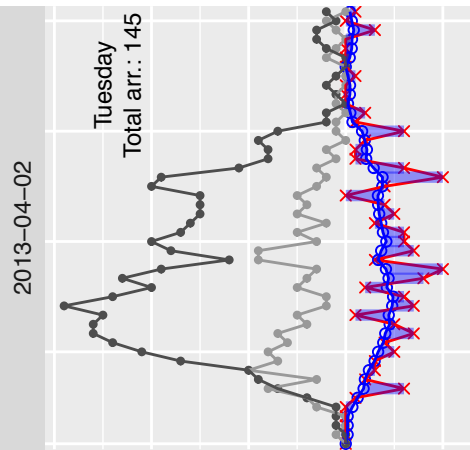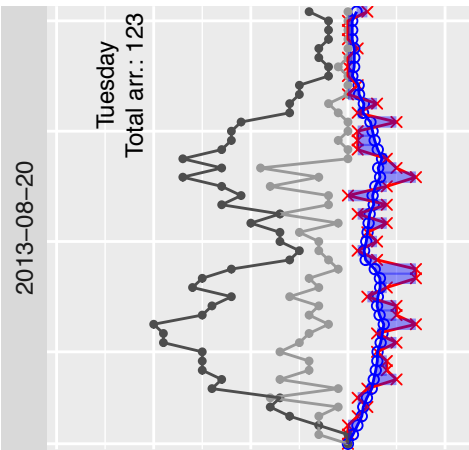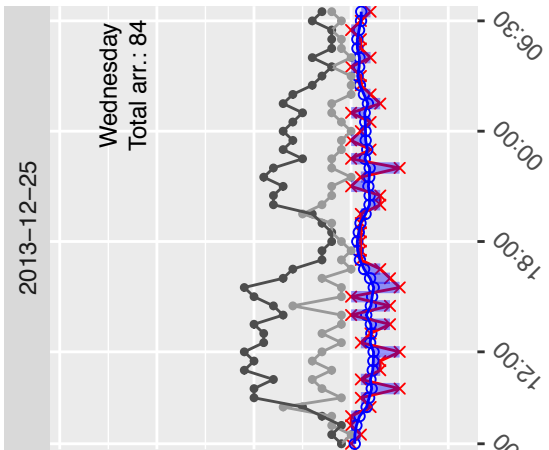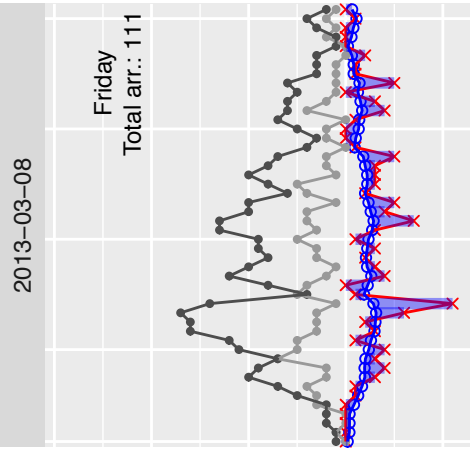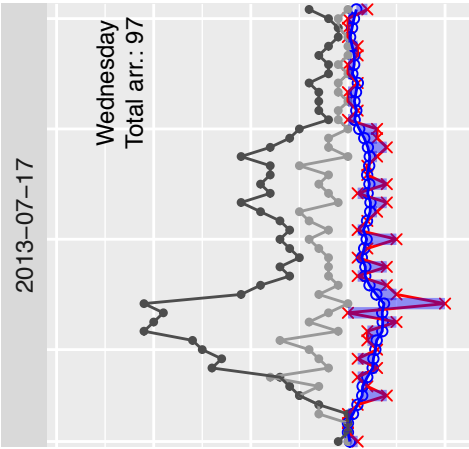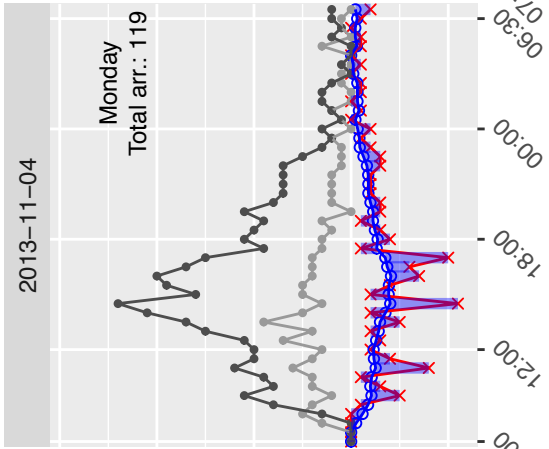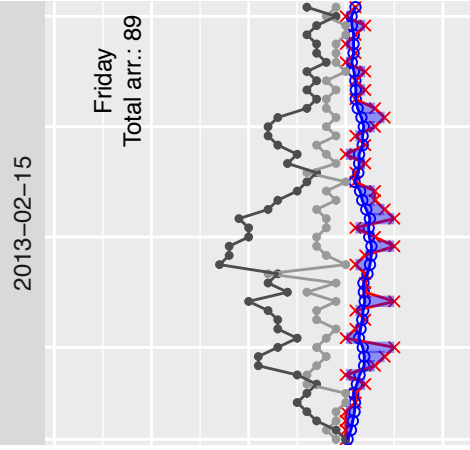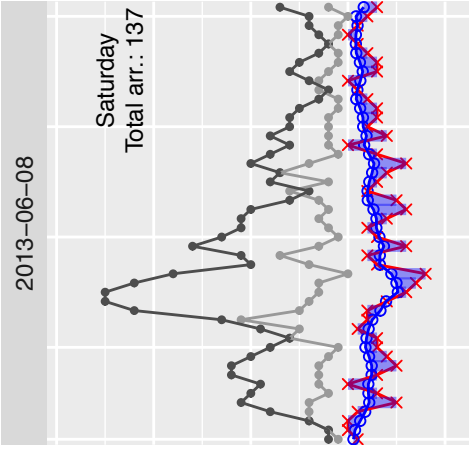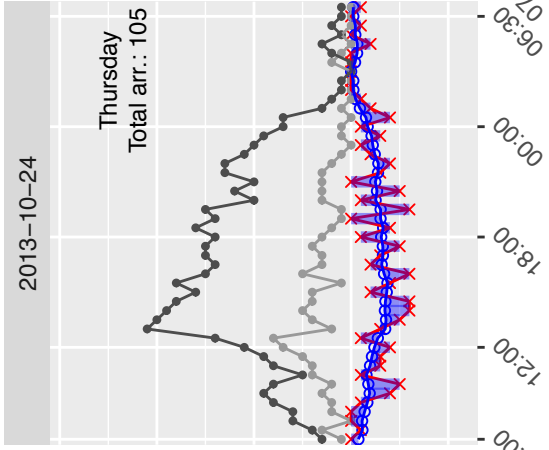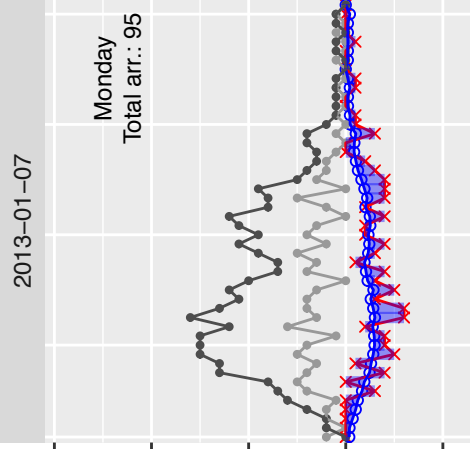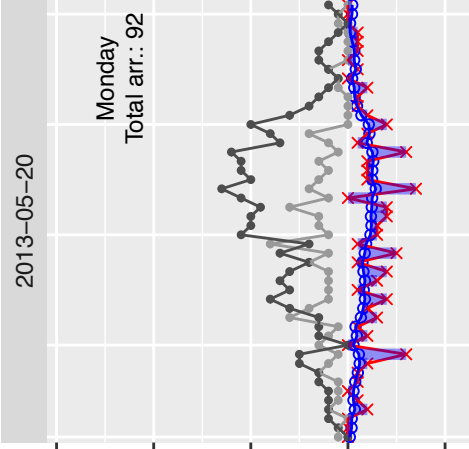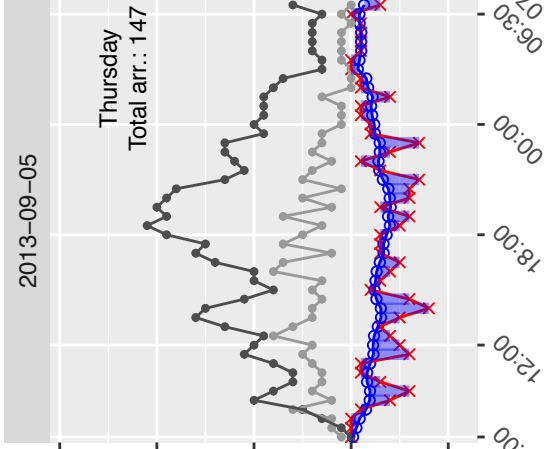

Arrivals & departures

Time of day
